# Supplementary material for: Hierarchical Co/CoO/FeO/C nanocomplex derived from Co(OH)2@NH2-MIL-88 to aid highly efficient microwave absorption
Source: Royal Society of Chemistry journal article supplement (doi:10.1039/d2nj04411k), 2022-01-01
Supplement: d2nj04411k1.pdf [file d2nj04411k1.pdf]

# Hierarchical Co/CoO/FeO/C Nanocomplex Derived from Co(OH)<sub>2</sub>@NH<sub>2</sub>-MIL-88 toward Highly Efficient Microwave Absorption

Peng Miao,<sup>a,c</sup> Weixing Chen,<sup>\*a</sup> Kailei Li,<sup>b</sup> Weifeng Zhao,<sup>a</sup> and Jie Kong<sup>\*b</sup>

<sup>a</sup> School of Materials and Chemical Engineering, Xi'an Technological University, Xi'an, Shaanxi, 710021, China

<sup>b</sup> School of Chemistry and Chemical Engineering, Northwestern Polytechnical University, Xi'an, Shaanxi, 710072, China

<sup>c</sup> Shaanxi Key Laboratory of Artificially-Structured Functional Materials and Devices, Xi'an, Shaanxi, 710043, China

\*Corresponding Authors: chenwx@xatu.edu.cn; kongjie@nwpu.edu.cn

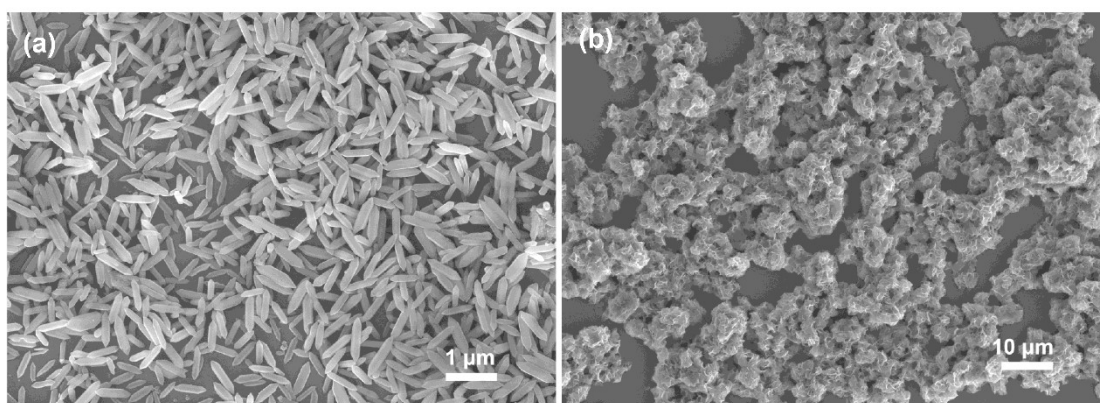

**Figure S1.** The SEM images of  $\text{NH}_2\text{-MIL-88B}$  (a) and  $\text{Co(OH)}_2@\text{NH}_2\text{-MIL-88B}$  (b).

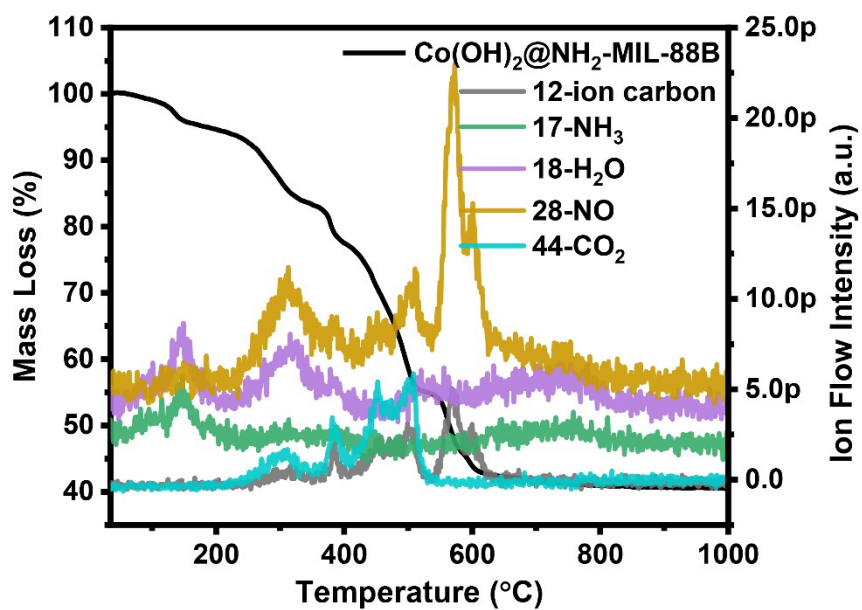

Figure S2. The TGA-MS curves of Co(OH)<sub>2</sub>@NH<sub>2</sub>-MIL-88B.

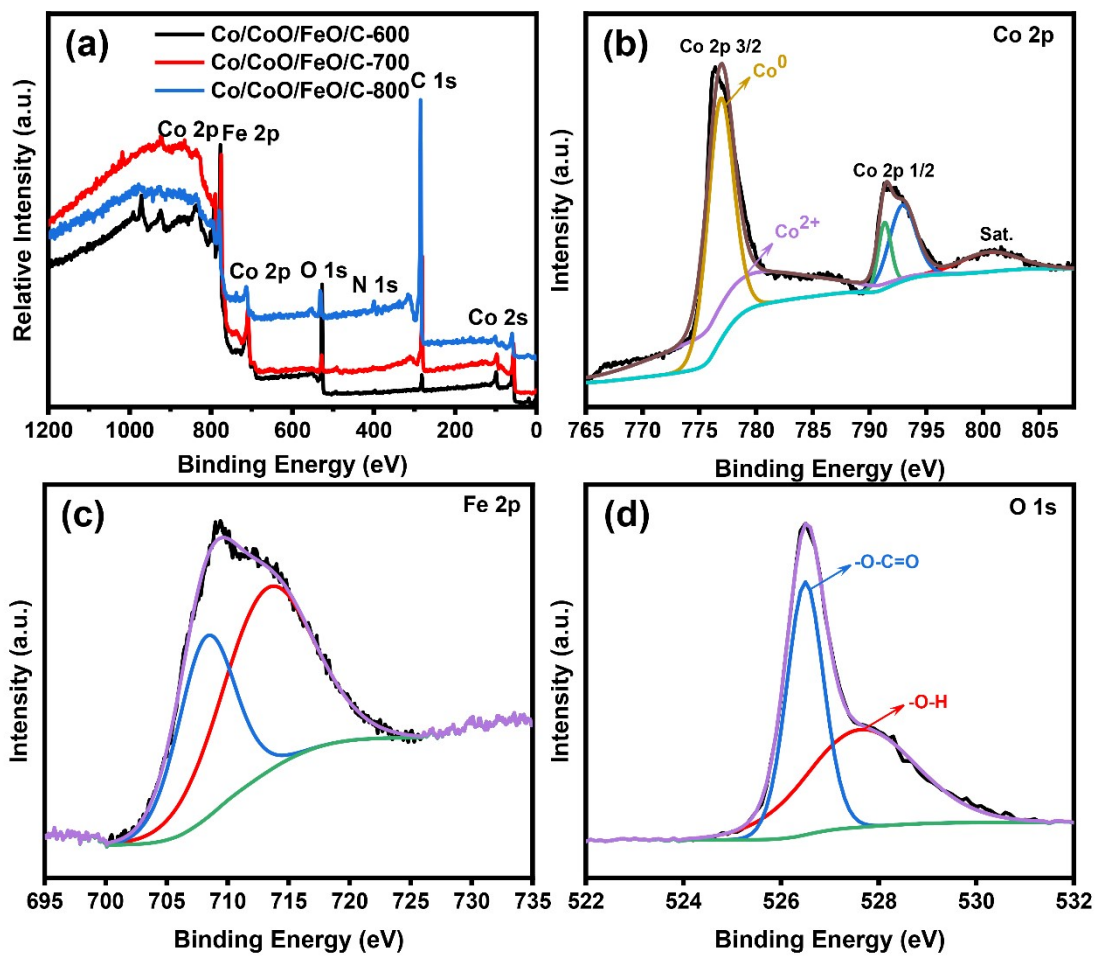

Figure S3. The XPS survey and convolution spectra of Co/CoO/FeO/C-600.

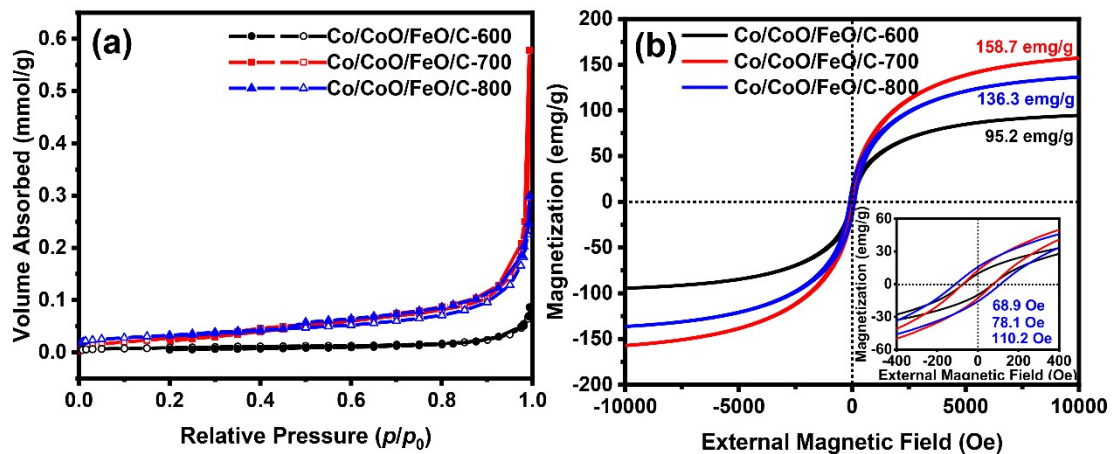

**Figure S4.** The characterization of Co/CoO/FeO/C-600/700/800. (a) 77 K N<sub>2</sub> sorption-desorption, (b)  $M-H$  curves

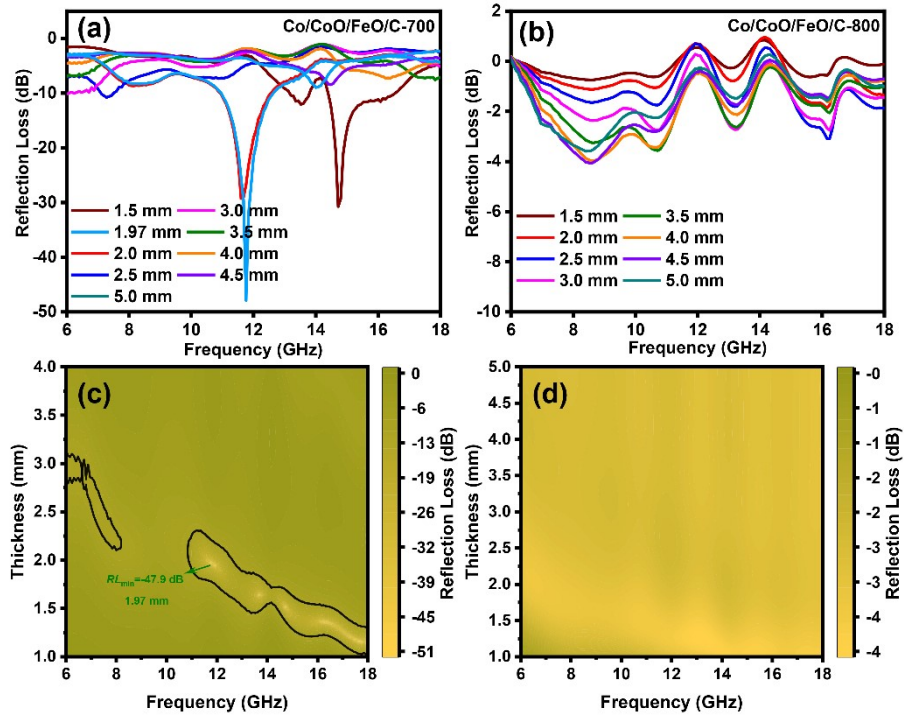

**Figure S5.** The microwave absorption performance of Co/CoO/FeO/C-700/800. (a) (c) 2D and 3D  $RL$  curves of Co/CoO/FeO/C-700, (b) (d) 2D and 3D  $RL$  curves of Co/CoO/FeO/C-800.

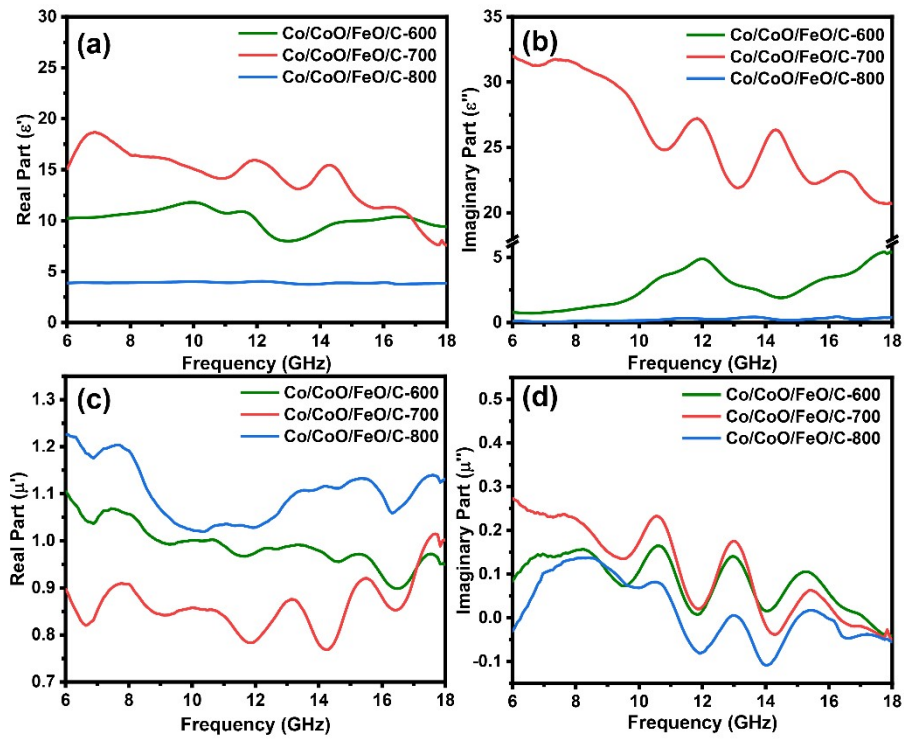

**Figure S6.** electromagnetic parameters of Co/CoO/FeO/C-600, Co/CoO/FeO/C-700, Co/CoO/FeO/C-800, respectively.

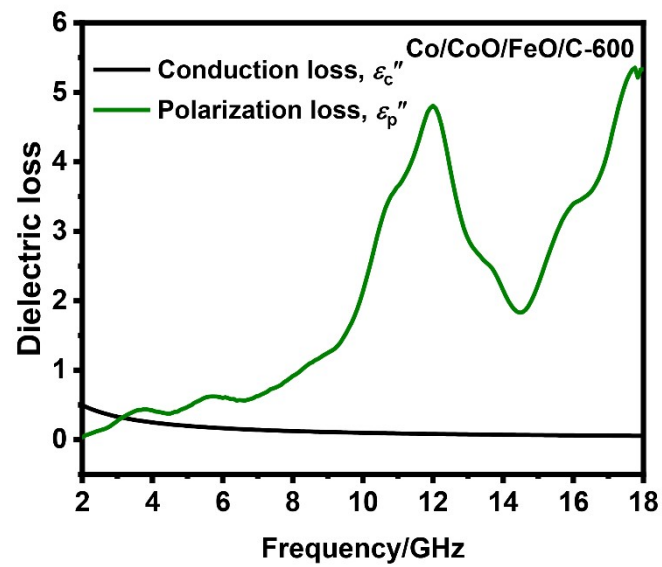

Figure S7. The contribution of the dielectric loss for Co/CoO/FeO/C-600.



**Table S1** MA performance of multicomponent complex as MAMs

| Name                                                  | $RL_{\min}$ (dB) | $d$ (mm) | EAB (GHz)     | Loading (%) | Ref.       |
|-------------------------------------------------------|------------------|----------|---------------|-------------|------------|
| Fe/MnO@C                                              | -45.0            | 2.0      | 5.0           | 50          | 1          |
| NiCo@C/ZnO                                            | -60.97           | 2.0      | 6.08          | 33          | 2          |
| CoFe alloys@ZnO@C                                     | -40.63           | 2.2      | 5.84 (2.4 mm) | 30          | 3          |
| CoFe <sub>2</sub> O <sub>4</sub> /CoFe@C              | -51              | 5.9      | 2.17          | 30          | 4          |
| Co/MnO@C                                              | -55.3            | 2.4      | 4.6           | 80          | 5          |
| Co@ZnO@NC                                             | -61.9            | 2.3      | 5.5           | 30          | 6          |
| Ni/NiO/C                                              | -47.72           | 1.9      | 5.67          | 40          | 7          |
| ZnFe <sub>2</sub> O <sub>4</sub> @SiO <sub>2</sub> @C | -54.29           | 3.39     | 5.66          | 30          | 8          |
| Co/CoO/FeO/C-600                                      | -45.5            | 2.01     | 4.7           | 30          | This study |

## References

- 1 G. He, Y. Duan and H. Pang, *Nano-Micro Lett.*, 2020, **12**, 57-73.
- 2 J. Wang, Z. Jia, X. Liu, J. Dou, B. Xu, B. Wang and G. Wu, *Nano-Micro Lett.*, 2021, **13**, 175-191.
- 3 M. Y. Kong, X. H. Liu, Z. R. Jia, B. B. Wang, X. M. Wu and G. L. Wu, *J. Colloid Interf. Sci.*, 2021, **604**, 39-51.
- 4 J. W. Ge, S. M. Liu, L. Liu, Y. Cui, F. D. Meng, Y. X. Li, X. F. Zhang and F. H. Wang, *J. Mater. Sci. Technol.*, 2021, **81**, 190-202.
- 5 D. M. Xu, N. N. Wu, K. Le, F. L. Wang, Z. Wang, L. L. Wu, W. Liu, A. C. Ouyang and J. R. Liu, *J. Mater. Chem. C*, 2020, **8**, 2451-2459.
- 6 K. Yang, Y. H. Cui, L. Y. Wan, Q. Y. Zhang and B. L. Zhang, *Carbon*, 2022, **190**, 366-375.
- 7 L. Lei, Z. Yao, J. Zhou, W. Zheng, B. Wei, J. Zu and K. Yan, *Carbon*, 2021, **173**, 69-79.
- 8 M. L. Ma, W. T. Li, Z. Y. Tong, Y. Ma, Y. X. Bi, Z. J. Liao, J. Zhou, G. L. Wu, M. X. Li, J. W. Yue, X. Y. Song and X. Y. Zhang, *J. Colloid Interf. Sci.*, 2020, **578**, 58-68.
